# Supplementary material for: Mo@Pt overlayers as efficient catalysts for hydrodeoxygenation of guaiacol and anisole
Source: Royal Society of Chemistry journal article supplement (doi:10.1039/c7cy00565b), 2017-01-01
Supplement: c7cy00565b1.pdf [file c7cy00565b1.pdf]

**Electronic supplementary information**

**Mo@Pt Overlayers as Efficient Catalysts for Hydrodeoxygenation of  
Guaiacol and Anisole**

Qinghua Lai, Chen Zhang, Joseph H. Holles\*

*Department of Chemical Engineering, University of Wyoming, Dept. 3295, 1000 E. University  
Ave, Laramie, WY 82071, United States*

\*Corresponding author. Tel.: +1-307-766-6772; fax: +1-307-766-6772. E-mail address:  
jholles@uwyo.edu (J.H. Holles).

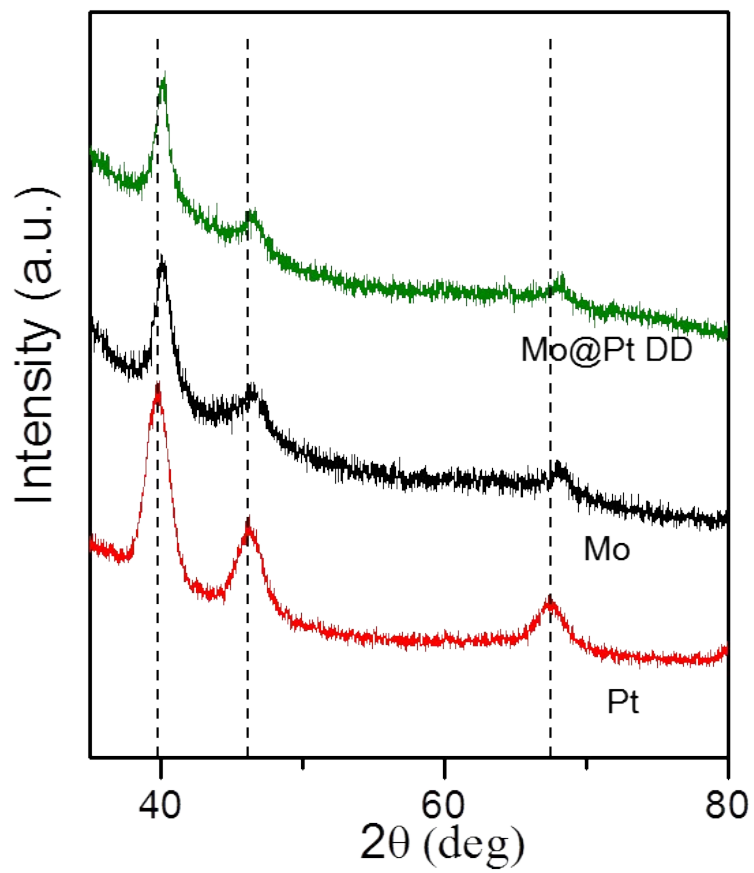

Fig. S1 XRD patterns of spent Mo, Pt and Mo@Pt DD catalysts.

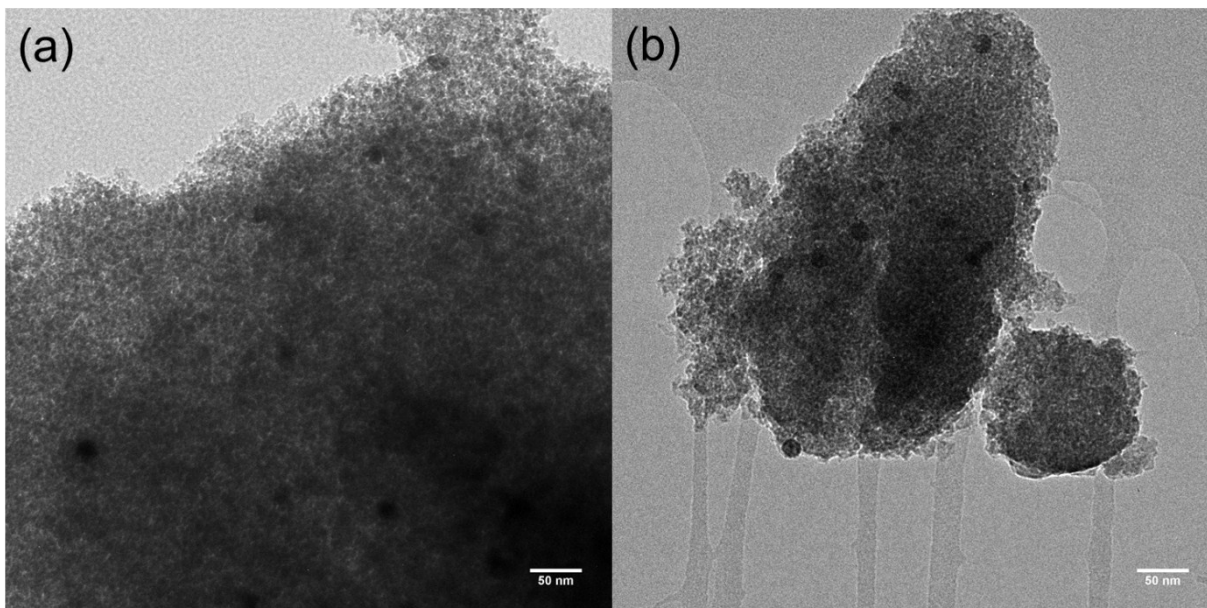

Fig. S2 TEM image of (a) fresh and (b) spent Mo@Pd DD catalyst.

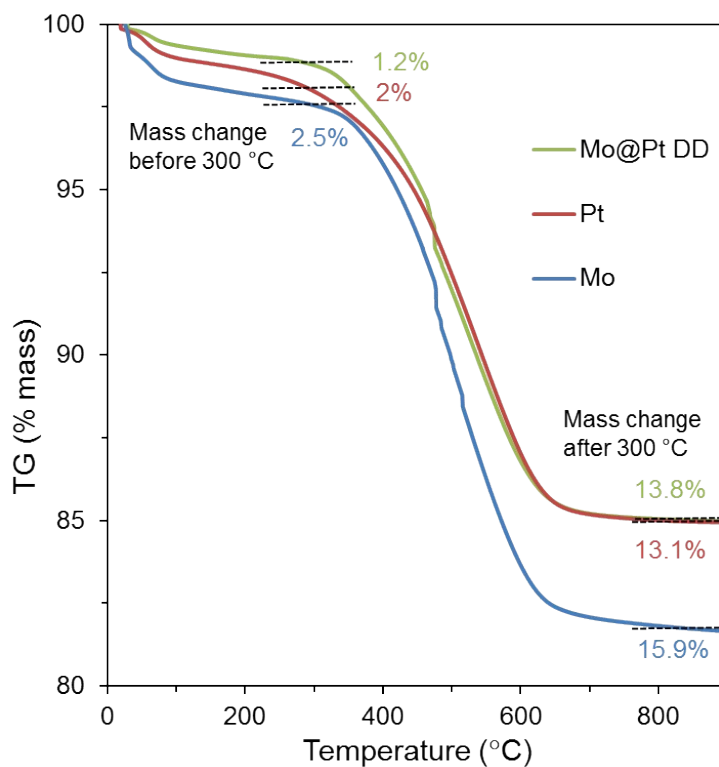

Fig. S3 Thermogravimetric analysis of spent Mo, Pt and Mo@Pt DD catalysts.
